# Supplementary material
Source: PubMed Central journal article supplement (PMC1855372)
Supplement: pnas_0701878104_3.pdf [file pnas_0701878104_3.pdf]

**Table 1. Constant model parameters**

| <b>Parameters</b> | <b>Definition and unit</b>                                                                            |
|-------------------|-------------------------------------------------------------------------------------------------------|
| $\tau_w$          | Development time of worms in human host (day)                                                         |
| $\mu_w$           | Worm natural mortality (/day)                                                                         |
| $h$               | Eggs excreted (/worm pair/gram feces)                                                                 |
| $\mu_z$           | Patent and latent snail death rate (/day)                                                             |
| $\sigma$          | Cercarial production (/sporocyst/day)                                                                 |
| $\alpha$          | Schistosome acquired (/cercaria/m <sup>2</sup> contact)                                               |
| $\rho$            | Snail infection (/miracidium/m <sup>2</sup> surface water)                                            |
| $\gamma$          | Spatial index representing the degree to which water contact and cercarial distribution converge      |
| $\xi$             | Spatial index representing the degree to which susceptible snail and miracidial distribution converge |
| $g_0$             | Mean fecal output (g)                                                                                 |
| $\beta$           | Fraction of eggs entering the environment due to agricultural fertilization practice                  |
| $A_h$             | Snail habitat (m <sup>2</sup> )                                                                       |
| $A_s$             | Surface water area (m <sup>2</sup> )                                                                  |
| $n_i$             | Number of people in group $i$                                                                         |
