# Supplementary material
Source: PubMed Central journal article supplement (PMC1855372)
Supplement: pnas_0701878104_4.pdf [file pnas_0701878104_4.pdf]

**Table 2. Time-varying model parameters**

| <b>Parameters</b> | <b>Definition and unit</b>                                                                         |
|-------------------|----------------------------------------------------------------------------------------------------|
| $S_i$             | Water contact index (average water contact area (m <sup>2</sup> )•minute/day)                      |
| $I_c$             | Temperature-dependent cercarial infectivity                                                        |
| $I_m$             | Temperature-dependent miracidial infectivity                                                       |
| x                 | Susceptible snail density                                                                          |
| $\tau_z$          | Temperature-dependent susceptible snail development time (day)                                     |
| $r_c$             | Fraction of cercariae (from infected snails) entering irrigation ditch environment due to rainfall |
| $r_e$             | Fraction of eggs entering irrigation ditch environment and hatching to miracidia due to rainfall   |
