# Supplementary material
Source: PubMed Central journal article supplement (PMC1855372)
Supplement: pnas_0701878104_5.pdf [file pnas_0701878104_5.pdf]

**Table 3. Schedule for field data collection and interventions**

|                | Calibration Period |   |   |   |   |    |      |    |   |   |   |   | Prediction & Intervention Period |   |    |    |   |   |      |   |   |    |    |    |      |   |   |   |   |   |    |    |   |   |   |   |   |   |   |    |
|----------------|--------------------|---|---|---|---|----|------|----|---|---|---|---|----------------------------------|---|----|----|---|---|------|---|---|----|----|----|------|---|---|---|---|---|----|----|---|---|---|---|---|---|---|----|
|                | 2000               |   |   |   |   |    | 2001 |    |   |   |   |   | 2002                             |   |    |    |   |   | 2003 |   |   |    |    |    | 2004 |   |   |   |   |   |    |    |   |   |   |   |   |   |   |    |
| Month          | 5                  | 6 | 7 | 8 | 9 | 10 | 11   | 12 | 2 | 5 | 6 | 7 | 8                                | 9 | 10 | 12 | 5 | 6 | 7    | 8 | 9 | 10 | 11 | 12 | 4    | 5 | 6 | 7 | 8 | 9 | 10 | 12 | 3 | 4 | 5 | 6 | 7 | 8 | 9 | 12 |
| Human survey   |                    |   |   |   |   |    |      |    |   |   |   |   |                                  |   |    |    |   |   |      |   |   |    |    |    |      |   |   |   |   |   |    |    |   |   |   |   |   |   |   |    |
| Water contact  |                    |   |   |   |   |    |      |    |   |   |   |   |                                  |   |    |    |   |   |      |   |   |    |    |    |      |   |   |   |   |   |    |    |   |   |   |   |   |   |   |    |
| Snail survey   |                    |   |   |   |   |    |      |    |   |   |   |   |                                  |   |    |    |   |   |      |   |   |    |    |    |      |   |   |   |   |   |    |    |   |   |   |   |   |   |   |    |
| Mouse bioassay |                    |   |   |   |   |    |      |    |   |   |   |   |                                  |   |    |    |   |   |      |   |   |    |    |    |      |   |   |   |   |   |    |    |   |   |   |   |   |   |   |    |
| Chemotherapy   |                    |   |   |   |   |    |      |    |   |   |   |   |                                  |   |    |    |   |   |      |   |   |    |    |    |      |   |   |   |   |   |    |    |   |   |   |   |   |   |   |    |
| Mollusciciding |                    |   |   |   |   |    |      |    |   |   |   |   |                                  |   |    |    |   |   |      |   |   |    |    |    |      |   |   |   |   |   |    |    |   |   |   |   |   |   |   |    |
| Egg control    |                    |   |   |   |   |    |      |    |   |   |   |   |                                  |   |    |    |   |   |      |   |   |    |    |    |      |   |   |   |   |   |    |    |   |   |   |   |   |   |   |    |

- Surveys and interventions stipulated by the project
- ⊗ Interventions carried out by local health authorities
- Sustained intervention
