# Supplementary material
Source: PubMed Central journal article supplement (PMC1855372)
Supplement: pnas_0701878104_6.pdf [file pnas_0701878104_6.pdf]

**Table 4. Intervention, timing, and coverage in the three villages**

|                                               | <b>Chemotherapy coverage (%)*</b> |                 |               |                 |                |               |
|-----------------------------------------------|-----------------------------------|-----------------|---------------|-----------------|----------------|---------------|
|                                               | <b>2002</b>                       |                 |               | <b>2004</b>     |                |               |
|                                               | <b>Farmer</b>                     | <b>Student</b>  | <b>Others</b> | <b>Farmer</b>   | <b>Student</b> | <b>Others</b> |
| Shian 5                                       | 72                                | 89              | 25            | 52              | 59             | 0             |
| Xinming 3                                     | 60                                | 62              | 0             | 32              | 35             | 0             |
| Xinlong 7                                     | 77                                | 72              | 50            | 43              | 47             | 25            |
| <b>Snail control coverage (%)<sup>†</sup></b> |                                   |                 |               |                 |                |               |
|                                               | <b>Time</b>                       | <b>Coverage</b> |               |                 |                |               |
| Shian 5                                       | Apr. 2003                         | 25              |               |                 |                |               |
| Xinming 3                                     | Apr. 2003                         | 35              |               |                 |                |               |
| Xinlong 7                                     | Jul. 2003                         | 12              |               |                 |                |               |
| <b>Egg control coverage (%)<sup>‡</sup></b>   |                                   |                 |               |                 |                |               |
|                                               | <b>Time</b>                       | <b>Coverage</b> | <b>Time</b>   | <b>Coverage</b> |                |               |
| Shian 5                                       | Apr. 2004                         | 75              |               |                 |                |               |
| Xinming 3                                     | Jun. 2004                         | 54              |               |                 |                |               |
| Xinlong 7                                     | Feb. 2004                         | 30              | Jul. 2005     | 89              |                |               |

\*Single dose praziquantel was administered for each treatment.

<sup>†</sup>Sustained mollusciciding via niclosamide, as planned by the project, was implemented in Shian 5 and Xinlong 7 to mimic the long-term effect of suppression of snail population on schistosomiasis transmission. An unplanned snail control (via surface spraying) was implemented in Xinlong 7 on June 2003 by local authorities, and was estimated to cover 12% of snail habitat.

<sup>‡</sup>Egg control was implemented through installation of household biogas digesters.
