# Supplementary material
Source: PubMed Central journal article supplement (PMC1855372)
Supplement: pnas_0701878104_7.pdf [file pnas_0701878104_7.pdf]

**Table 5. Prevalence and intensity of infections in three risk groups of the three villages in 2002 and 2004**

| <b>2002</b>                                           |                   |                     |               |                |               |               |                |               |
|-------------------------------------------------------|-------------------|---------------------|---------------|----------------|---------------|---------------|----------------|---------------|
| <b>Prevalence of infection,% (infected/surveyed)*</b> |                   |                     |               |                |               | <b>e.p.g.</b> |                |               |
|                                                       | <b>No. people</b> | <b>No. surveyed</b> | <b>Farmer</b> | <b>Student</b> | <b>Others</b> | <b>Farmer</b> | <b>Student</b> | <b>Others</b> |
| Shian 5                                               | 125               | 100                 | 44.6 (33/74)  | 20.8 (5/24)    | 0 (0/1)       | 12.8          | 1.0            | 0             |
| Xinming 3                                             | 240               | 211                 | 36.6(53/145)  | 24.6 (16/65)   | 0 (0/1)       | 7.1           | 11.6           | 0             |
| Xinlong 7                                             | 157               | 119                 | 42.4 (36/85)  | 20 (6/30)      | 67 (2/3)      | 22.6          | 4.0            | 10.7          |
| <b>2004</b>                                           |                   |                     |               |                |               |               |                |               |
| Shian 5                                               | 125               | 101                 | 12.8 (10/78)  | 4.6 (1/22)     | 33 (1/3)      | 6.3           | 0.36           | 69            |
| Xinming 3                                             | 240               | 198                 | 41 (16/39)    | 15.3 (9/59)    | 0 (0/0)       | 2.5           | 3.0            | 0             |
| Xinlong 7                                             | 157               | 123                 | 25.8 (23/89)  | 15.6 (5/32)    | 50 (1/2)      | 12.5          | 6.3            | 4             |

\*Human infection was examined by miracidium hatch test and the Kato-Katz thick-smear test, and either positive was regarded as infected. For the Kato-Katz test, three slides were read for each subject. Detailed procedure was described by Spear *et al.* (1).

1. Spear RC, Seto E, Liang S, Birkner M, Hubbard A, Qiu D, Yang C, Zhong B, Xu F, Gu X, Davis GM (2004) *Am J Trop Med Hyg* 70:48-56.
