# Supplementary material
Source: PubMed Central journal article supplement (PMC1855372)

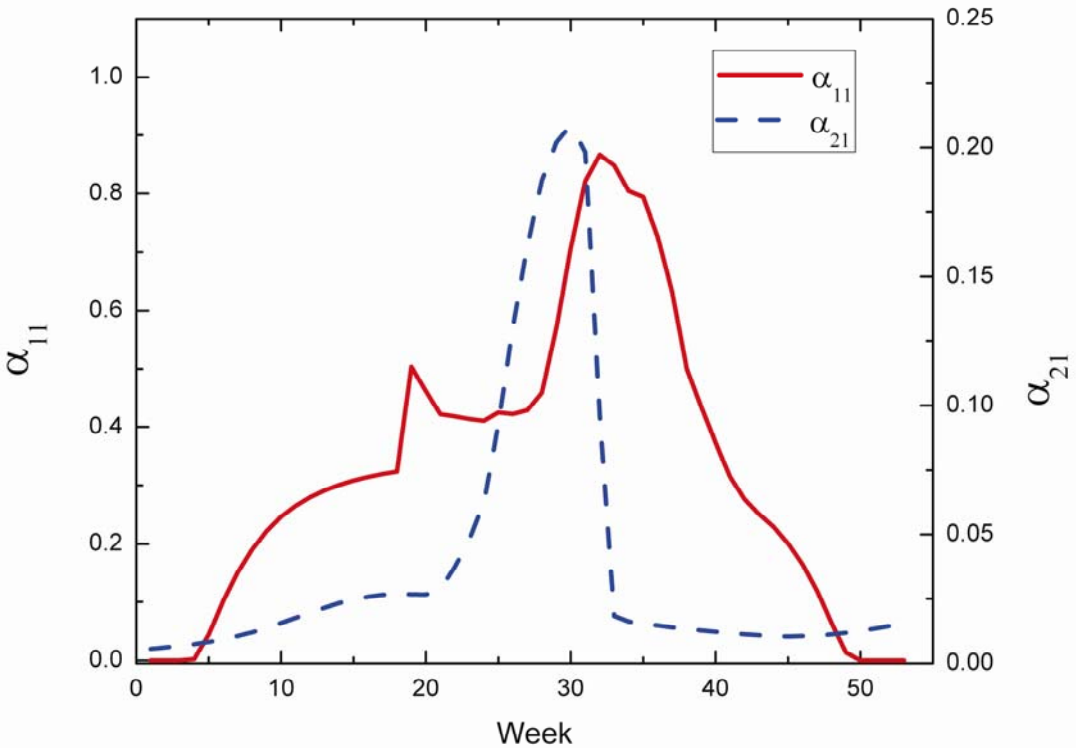

Supplement: pnas_0701878104_1.pdf [file pnas_0701878104_1.pdf]

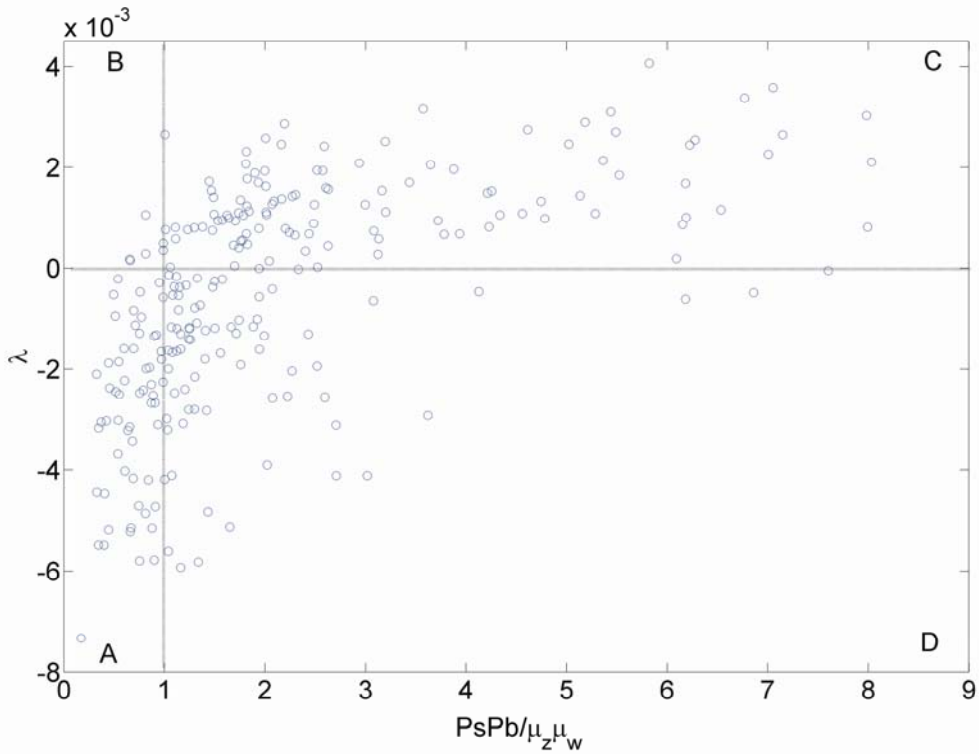

Supplement: pnas_0701878104_2.pdf [file pnas_0701878104_2.pdf]
